# Supplementary material for: High Prevalence of Asthma in Elderly Women: Findings From a Korean National Health Database and Adult Asthma Cohort
Source: PubMed Central journal article supplement — Allergy Asthma Immunol Res. 2018 Jun 18;10(4):387–96. doi: 10.4168/aair.2018.10.4.387 (PMC6021593; doi:10.4168/aair.2018.10.4.387), 2018-06-18
Supplement: aair-10-387-s001.pdf [file aair-10-387-s001.pdf]

**Supplementary Table 1.** Diagnosis, drug and procedure codes with descriptions

| Code          | Description                                                 |           |           |           |           |           |           |
|---------------|-------------------------------------------------------------|-----------|-----------|-----------|-----------|-----------|-----------|
| ICD-10 codes  |                                                             |           |           |           |           |           |           |
| J45           | Asthma                                                      |           |           |           |           |           |           |
| J45.0         | Predominantly allergic asthma                               |           |           |           |           |           |           |
| J45.0-002     | Atopic asthma                                               |           |           |           |           |           |           |
| J45.0-003     | Extrinsic allergic asthma                                   |           |           |           |           |           |           |
| J45.1         | Nonallergic asthma                                          |           |           |           |           |           |           |
| J45.1-001     | Intrinsic nonallergic asthma                                |           |           |           |           |           |           |
| J45.1-002     | Idiosyncratic asthma                                        |           |           |           |           |           |           |
| J45.8         | Mixed asthma                                                |           |           |           |           |           |           |
| J45.9         | Asthma, unspecified                                         |           |           |           |           |           |           |
| J45.9-001     | Late-onset asthma                                           |           |           |           |           |           |           |
| J45.9-002     | Asthmatic bronchitis NOS                                    |           |           |           |           |           |           |
| J46.0         | Status asthmaticus                                          |           |           |           |           |           |           |
| J46.1         | With nonallergic asthma                                     |           |           |           |           |           |           |
| J46.8         | With mixed asthma                                           |           |           |           |           |           |           |
| J46.9         | With unspecified asthma                                     |           |           |           |           |           |           |
| Procedure     |                                                             |           |           |           |           |           |           |
| F6001         | Pulmonary function test (flow-volume test is not performed) |           |           |           |           |           |           |
| F6002         | Pulmonary function test (flow-volume test included)         |           |           |           |           |           |           |
| F6012         | Pulmonary function test (cardiopulmonary exercise tests)    |           |           |           |           |           |           |
| E7122         | Bronchial provocation test (specific antigen)               |           |           |           |           |           |           |
| E7123         | Bronchial provocation test (reversibility test)             |           |           |           |           |           |           |
| E7128         | Bronchial provocation test NOS (mannitol provocation test)  |           |           |           |           |           |           |
| E7129         | Bronchial provocation test NOS                              |           |           |           |           |           |           |
| Drugs (codes) |                                                             |           |           |           |           |           |           |
| 107301ATB     | 135301ASY                                                   | 163101ACH | 193501BIJ | 218303ASY | 237002ACR | 374602ATB | 506600CSI |
| 107301ATR     | 135302ATB                                                   | 163101ASY | 193502BIJ | 218304CSI | 237003ACH | 374602ATD | 525700CSI |
| 107302BIJ     | 140801ATB                                                   | 163101ATB | 193601BIJ | 225501ATB | 237003ACR | 374603AGN | 525800CSI |
| 107303ATR     | 140802ATB                                                   | 163102CSI | 193602BIJ | 225502CSI | 237003ASY | 374603ATB | 526200CSI |
| 113601ATB     | 141901ATB                                                   | 163104ASY | 193603BIJ | 225503ACR | 237003ATR | 374603ATD | A0055101  |
| 113602ASY     | 141903ATB                                                   | 163104ATB | 193604BIJ | 225503ATB | 237004ACR | 391800CSI | A0064701  |
| 113801ATB     | 142001BIJ                                                   | 168901ATB | 199701CAE | 225503ATR | 237005ATR | 401800CSI | A0064801  |
| 113802ATB     | 142201BIJ                                                   | 168901BIJ | 204801ATB | 225505ASY | 243201ATB | 407100CSI | A0080001  |
| 114506CSI     | 142202BIJ                                                   | 169001ATB | 204802BIJ | 225506CSI | 243202ATB | 407200CSI | A0087101  |
| 114507CSI     | 142203BIJ                                                   | 170901ATB | 206901ATB | 225507ACR | 243203ATB | 407300CSI | A0132601  |
| 114508CSI     | 144001ATB                                                   | 170905ATB | 216401ACH | 225507ATR | 243301BIJ | 439101ATB | A0189801  |
| 114509CSI     | 147101ATB                                                   | 170906ATB | 216402ASS | 225508CSI | 243303BIJ | 441700CSI | A1015001  |
| 114510CSI     | 147102BIJ                                                   | 171201BIJ | 216402ASY | 225509CSI | 243305BIJ | 449600ATB | B0024301  |
| 116401ATB     | 152401BIJ                                                   | 171202BIJ | 216403ACH | 225601ACR | 243306CSI | 452101CPC | B0086404  |
| 116501ATB     | 152601BIJ                                                   | 171203BIJ | 216404ATB | 225601ATR | 245701ATB | 452102CPC | B0134101  |
| 116502BIJ     | 152601CLQ                                                   | 177101CLQ | 216405ATB | 225802CSI | 249701ATB | 452103CPC | B0201201  |
| 119402CAE     | 152602BIJ                                                   | 177103CLQ | 217001ATB | 235801ATB | 264800ATB | 453400CSI |           |
| 119403CAE     | 157901ATB                                                   | 177104CAE | 217003ASY | 235803CSI | 316100BIJ | 457301CCH |           |
| 119404CSI     | 157902CLQ                                                   | 178301BIJ | 217004ASY | 235804ASY | 334400CAE | 457301CSI |           |
| 119405CLQ     | 157903CAE                                                   | 192301ATB | 217101BIJ | 235805CLQ | 334500CSI | 497101CSI |           |
| 119407CAE     | 162202CSI                                                   | 193301ATB | 217301BIJ | 235806ATB | 334600CSI | 497102CSI |           |
| 119502CSI     | 162203CSS                                                   | 193302ATB | 217302BIJ | 235806ATR | 334700CSI | 502000CSI |           |
| 119504CAE     | 162204CSI                                                   | 193303ATB | 217401ATB | 236901ASY | 334800CAE | 503401CSI |           |
| 119505CSI     | 162205CSI                                                   | 193304ATB | 218301ATB | 237001ACH | 374601ATB | 506400CSI |           |
| 119506CSI     | 162206CSS                                                   | 193305ATB | 218302ATB | 237001ACR | 374601ATD | 506500CSI |           |

ICD-10, International Classification of Disease, Tenth Revision, Clinical Modification; NOS, not otherwise specified.
