# Supplementary material for: High Prevalence of Asthma in Elderly Women: Findings From a Korean National Health Database and Adult Asthma Cohort
Source: PubMed Central journal article supplement — Allergy Asthma Immunol Res. 2018 Jun 18;10(4):387–96. doi: 10.4168/aair.2018.10.4.387 (PMC6021593; doi:10.4168/aair.2018.10.4.387), 2018-06-18
Supplement: aair-10-387-s002.pdf [file aair-10-387-s002.pdf]

**Supplementary Table 2.** Distribution of asthma severity and rate of exacerbation from 2002 to 2012: NHIS-NSC database

| Characteristics       | 2002 | 2003 | 2004 | 2005 | 2006 | 2007 | 2008 | 2009 | 2010 | 2011 | 2012  |
|-----------------------|------|------|------|------|------|------|------|------|------|------|-------|
| Severity (%)          |      |      |      |      |      |      |      |      |      |      |       |
| Mild                  | 18.0 | 12.4 | 8.1  | 7.4  | 6.5  | 5.2  | 3.9  | 2.9  | 2.5  | 2.3  | 2.5   |
| Moderate              | 70.0 | 74.8 | 79.1 | 79.1 | 77.4 | 78.6 | 79.8 | 80.2 | 81.5 | 81.1 | 81.4  |
| Severe                | 11.6 | 12.7 | 12.4 | 11.4 | 11.3 | 11.6 | 11.9 | 11.9 | 11.4 | 12.4 | 11.45 |
| Exacerbation rate (%) | 32.8 | 37.2 | 33.2 | 30.5 | 28.3 | 27.3 | 25.3 | 24.1 | 25.5 | 26.1 | 25.8  |

NHIS-NSC, National Health Insurance Service-National Sample Cohort.
