# Supplementary material for: High Prevalence of Asthma in Elderly Women: Findings From a Korean National Health Database and Adult Asthma Cohort
Source: PubMed Central journal article supplement — Allergy Asthma Immunol Res. 2018 Jun 18;10(4):387–96. doi: 10.4168/aair.2018.10.4.387 (PMC6021593; doi:10.4168/aair.2018.10.4.387), 2018-06-18
Supplement: aair-10-387-s003.pdf [file aair-10-387-s003.pdf]

**Supplementary Table 3.** Identified risk factors for asthma exacerbation: SCH asthma cohort database (replication)

| Characteristics                | Univariate analysis |         |                 | Multivariate analysis |        |                 |
|--------------------------------|---------------------|---------|-----------------|-----------------------|--------|-----------------|
|                                | OR (95% CI)         | Pvalue  | No. of patients | OR (95% CI)           | Pvalue | No. of patients |
| Age                            | 1.02 (1.01-1.03)    | < 0.001 | 2,195           | 0.98 (0.84-1.14)      | 0.770  | 2,195           |
| Sex (female)*                  | 1.15 (0.89-1.48)    | 0.284   | 2,195           |                       |        |                 |
| BMI                            | 1.00 (0.99-1.00)    | 0.805   | 2,195           |                       |        |                 |
| Pack-years                     | 0.99 (0.99-1.01)    | 0.440   | 2,195           |                       |        |                 |
| Pre-bronchodilator FEV1 (%)    | 0.95 (0.94-0.96)    | < 0.001 | 2,195           | 0.71 (0.55-0.90)      | 0.006  | 2,195           |
| Pre-bronchodilator FVC (%)     | 0.95 (0.94-0.96)    | < 0.001 | 2,195           | 1.26 (1.01-1.56)      | 0.039  | 2,195           |
| Post-bronchodilator FEV1 (%)   | 1.04 (1.02-1.05)    | < 0.001 | 2,195           | 1.01 (0.92-1.11)      | 0.822  | 2,195           |
| PC <sub>20</sub>               | 0.98 (0.96-1.00)    | 0.019   | 2,195           | 0.95 (0.87-1.04)      | 0.283  | 2,195           |
| Blood eosinophil (%)           | 1.06 (1.03-1.08)    | < 0.001 | 2,195           | 0.90 (0.65-1.24)      | 0.509  | 2,195           |
| Sputum eosinophil (%)          | 1.00 (0.99-1.01)    | 0.527   | 2,195           |                       |        |                 |
| Sputum neutrophil (%)          | 1.01 (1.00-1.02)    | 0.008   | 2,195           | 1.02 (0.97-1.09)      | 0.406  | 2,195           |
| Blood total IgE (IU/mL)        | 1.00 (1.00-1.00)    | 0.049   | 2,195           | 1.00 (1.00-1.00)      | 0.119  | 2,195           |
| Log (total IgE)                | 1.30 (1.07-1.59)    | 0.009   | 2,195           | 0.08 (0.01-0.58)      | 0.013  | 2,195           |
| Allergic rhinitis              | 0.68 (0.44-1.07)    | 0.021   | 2,195           | 0.31 (0.08-1.25)      | 0.101  | 2,195           |
| Aspirin hypersensitivity       | 0.68 (0.44-1.07)    | 0.094   | 2,195           |                       |        |                 |
| Duration of asthma (month)     | 1.00 (1.00-1.00)    | 0.072   | 2,195           |                       |        |                 |
| Symptom duration (month)       | 1.00 (1.00-1.00)    | 0.003   | 2,195           | 1.12 (0.97-1.30)      | 0.134  | 2,195           |
| History of asthma exacerbation | 0.04 (0.05-0.26)    | 0.001   | 2,195           | 1.00 (0.9-1.01)       | 0.94   | 2,195           |

SCH, Soonchunhyang University Asthma Genome Research Center; OR, odds ratio; CI, confidence interval; BMI, body mass index; FEV1, forced expiration volume in 1 second; FVC, forced vital capacity; PC<sub>20</sub>, concentration of methacholine that caused a 20% fall in FEV1; IgE, immunoglobulin E.

\*The sex defines female in relation to male.
