# Supplementary material for: High Prevalence of Asthma in Elderly Women: Findings From a Korean National Health Database and Adult Asthma Cohort
Source: PubMed Central journal article supplement — Allergy Asthma Immunol Res. 2018 Jun 18;10(4):387–96. doi: 10.4168/aair.2018.10.4.387 (PMC6021593; doi:10.4168/aair.2018.10.4.387), 2018-06-18
Supplement: aair-10-387-s004.pdf [file aair-10-387-s004.pdf]

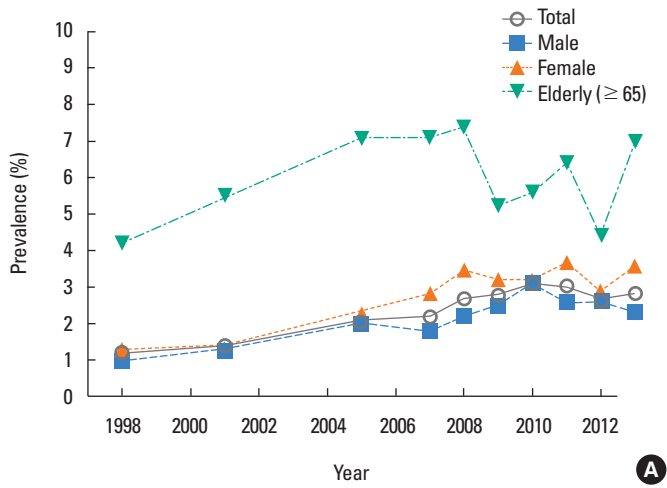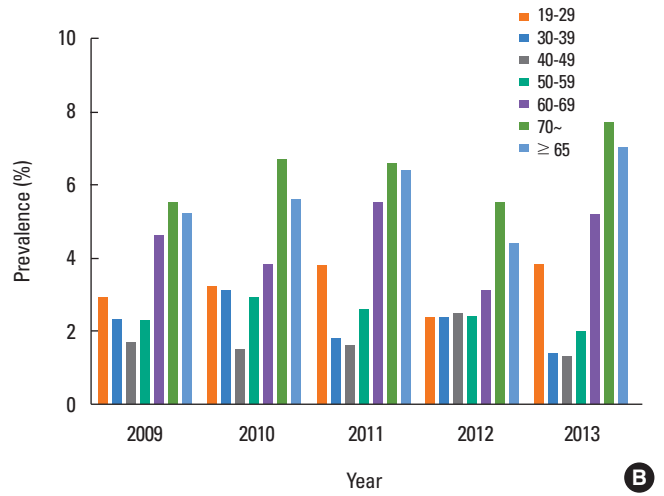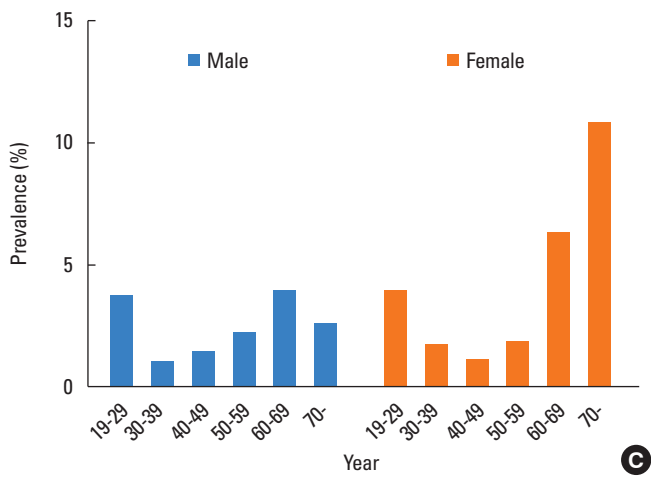

**Supplementary Fig. 1.** Prevalence of asthma in Korea: KNHANES database. (A) Prevalence of adult asthma from 1998 to 2013. (B) Comparison of prevalence according to age for five years, from 2009 to 2013. (C) Comparison of prevalence according to age and sex in 2013.
