# Supplementary material for: High Prevalence of Asthma in Elderly Women: Findings From a Korean National Health Database and Adult Asthma Cohort
Source: PubMed Central journal article supplement — Allergy Asthma Immunol Res. 2018 Jun 18;10(4):387–96. doi: 10.4168/aair.2018.10.4.387 (PMC6021593; doi:10.4168/aair.2018.10.4.387), 2018-06-18
Supplement: aair-10-387-s005.pdf [file aair-10-387-s005.pdf]

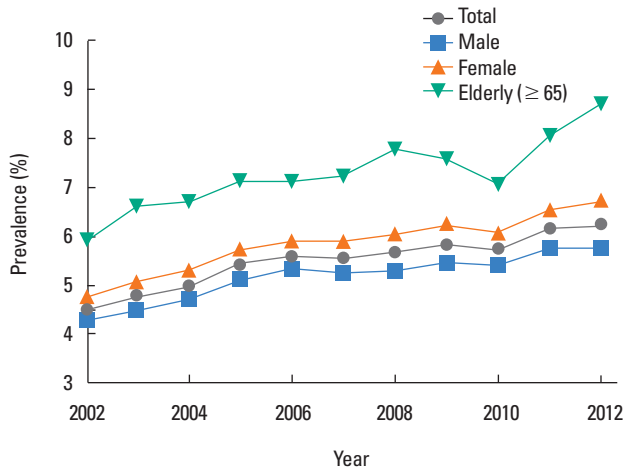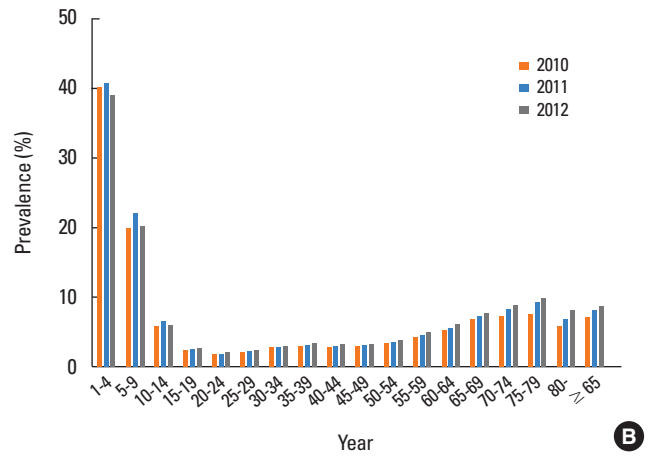

**Supplementary Fig. 2.** Prevalence of asthma in Korea: NHIS-NSC database. (A) Prevalence of asthma from 2002 to 2012. (B) Comparison of prevalence according to age from 2010 to 2012.
